# Supplementary material for: Buckling of geometrically confined shells
Source: Royal Society of Chemistry journal article supplement (doi:10.1039/c8sm02035c), 2018-12-04
Supplement: c8sm02035c1.pdf [file c8sm02035c1.pdf]

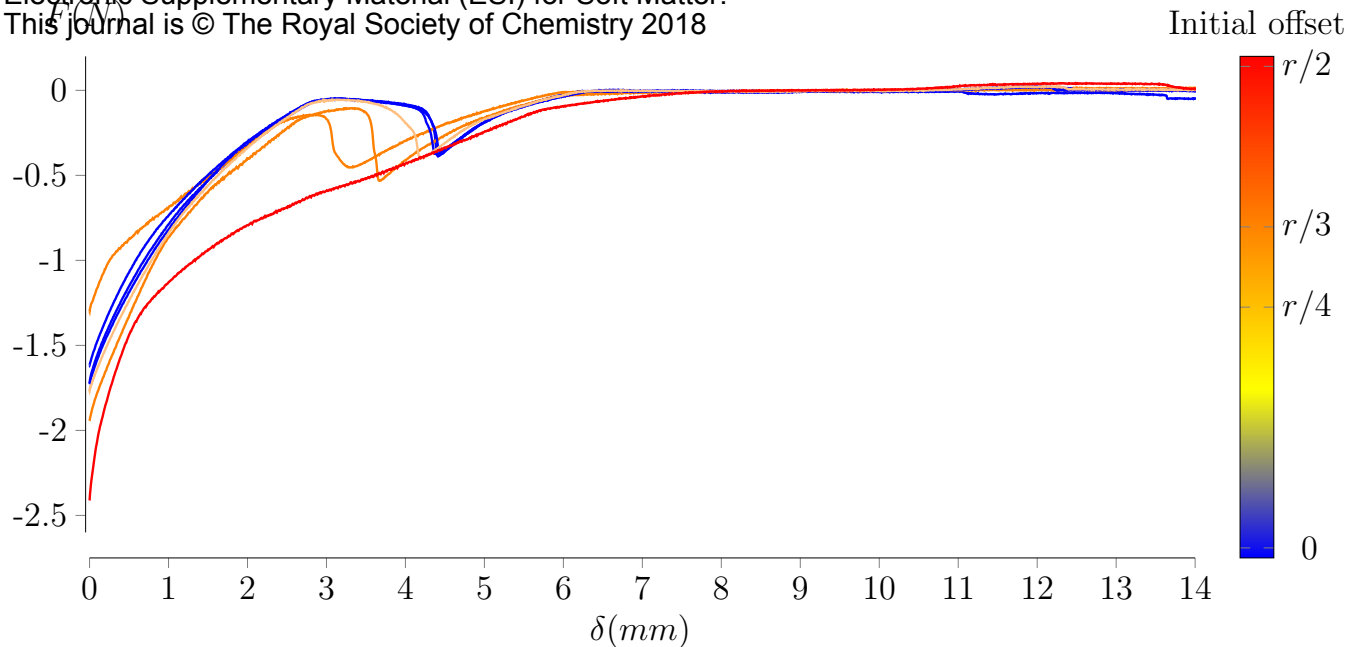

Shells are sensitive to initial conditions: for a shell of  $R = 30$  and  $r \approx 10$  ( $\ell_p \approx 3$ ) that is initially off-center, the effect on  $\delta_c$  is on the order of the offset. If the offset is large enough, the wavenumber at  $\delta = 0$  decreases (red curve).
